# Supplementary material
Source: PubMed Central journal article supplement (PMC6223129)
Supplement: NIHMS955740-supplement-Suppl_Fig__1.pdf [file NIHMS955740-supplement-Suppl_Fig__1.pdf]

Figure 1

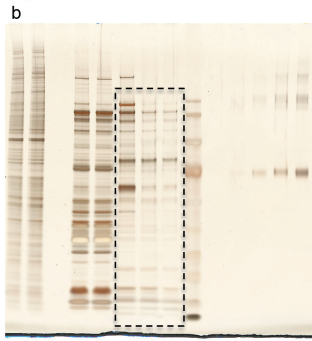

Extended Data Figure 1

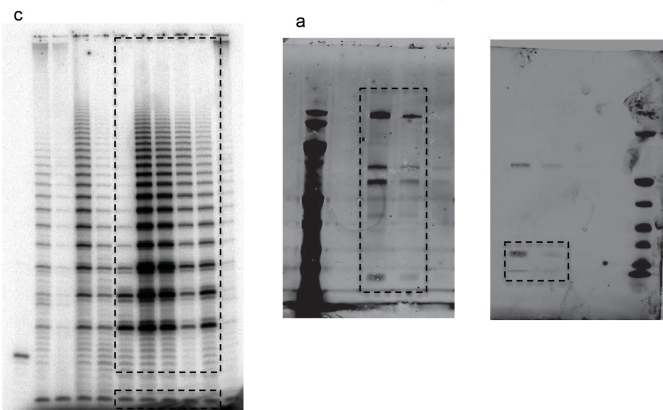

Extended Data Figure 1

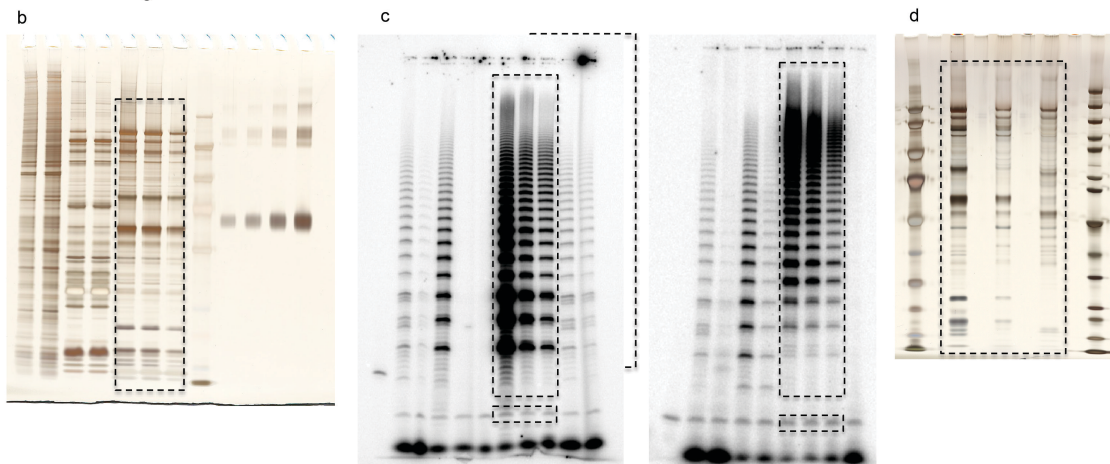

Extended Data Figure 2

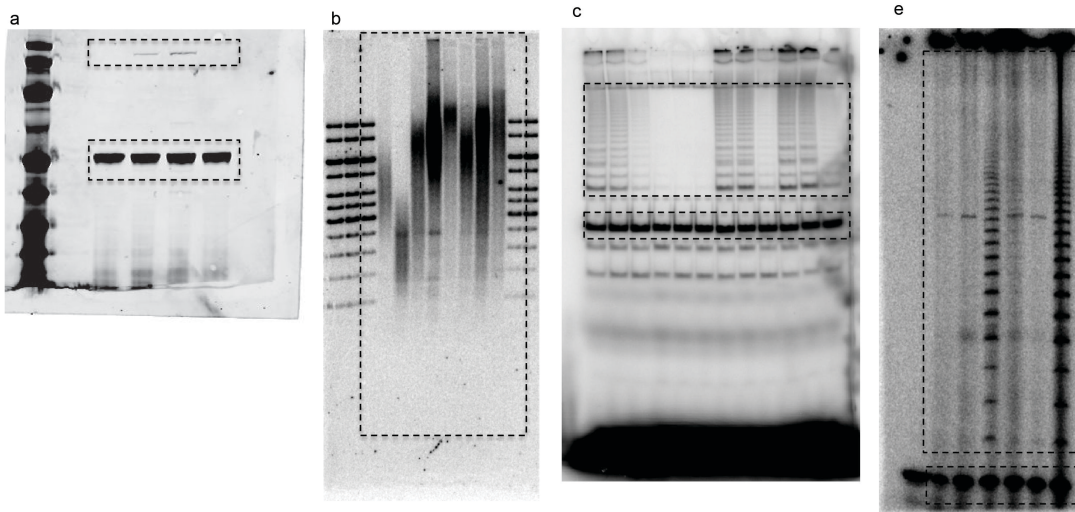

## Supplementary Figure 1

Source images for all data obtained by gel electrophoresis in indicated Figures.
